# Supplementary material
Source: Springer Nature journal article supplement (https://www.springermedizin.de/resource/supplementary/12885_2011_2928_MOESM1_ESM.pdf/9462318)
Supplement: MOESM1 [file 9462318]

CROAP-3  
 CROAP-2  
 CROAP-6  
 CROAP-5  
 HBL-6  
 BC-2  
 BCP-1  
 BC-1  
 BCBL-1  
 JSC-1  
 BC-3

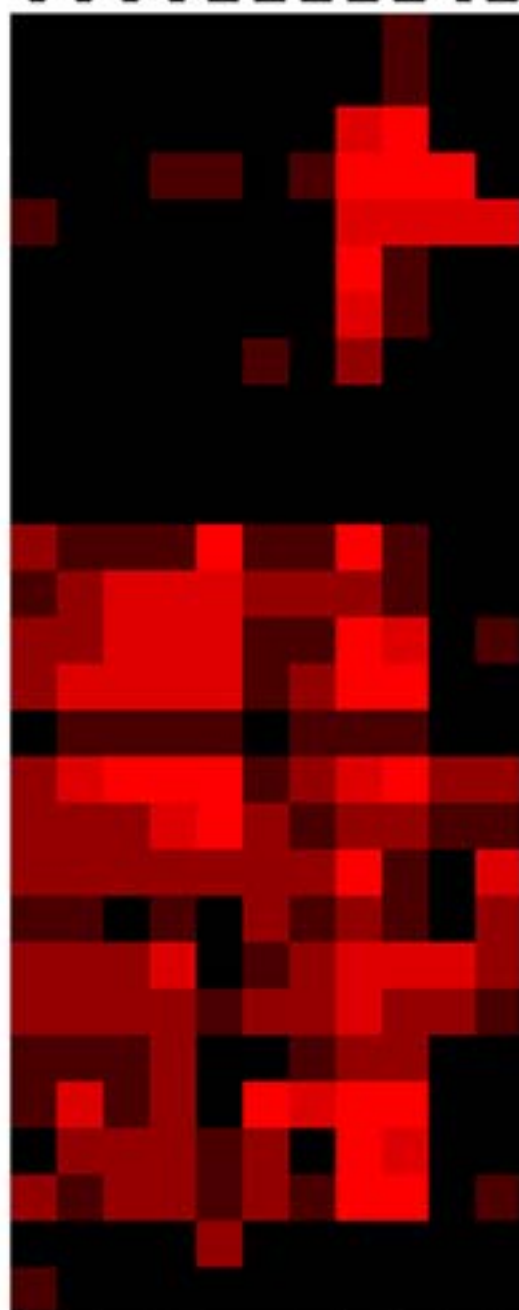

Carboplatin  
 Bortezomib  
 Cytara  
 Vincristine  
 Fludara  
 Mitomycin  
 Cladribine  
 Bleomycin  
 Prednisolone  
 Oxaliplatin  
 Cisplatin  
 Doxorubicin  
 Vinblastin  
 Paclitaxel  
 Docetaxel  
 Topotecan  
 Vinorelbine  
 Epirubicin  
 Chlorambucil  
 Asparaginase  
 Daunorubicin  
 Dactinomycin  
 5-Fluorouracil  
 Gemcitabine  
 Methotrexate  
 Etoposide  
 Hydroxyurea  
 6-Mercaptopurine

|          |    |    |    |    |    |    |    |    |    |    |    |
|----------|----|----|----|----|----|----|----|----|----|----|----|
| EBV      | -  | +  | -  | +  | +  | +  | -  | +  | -  | +  | -  |
| HIV      | +  | +  | +  | +  | +  | +  | -  | +  | +  | +  | -  |
| AGE      | 42 | 49 | 26 | 35 | 46 | 31 | 94 | 46 | 40 | 52 | 85 |
| Specimen | A  | P  | P  | P  | A  | P  | B  | A  | A  | A  | A  |
